# Supplementary material for: Formation and control of line defects caused by tectonics of water droplet arrays during self-organized honeycomb-patterned polymer film formation
Source: Royal Society of Chemistry journal article supplement (doi:10.1039/c3sm52790e), 2013-12-23

† Supporting information

The LMS images(1000times) of 15 spots (①~⑮) on the A4-size defect free honeycomb-pattered polymer films are shown as follws. No defect was found in all of 15 spots.

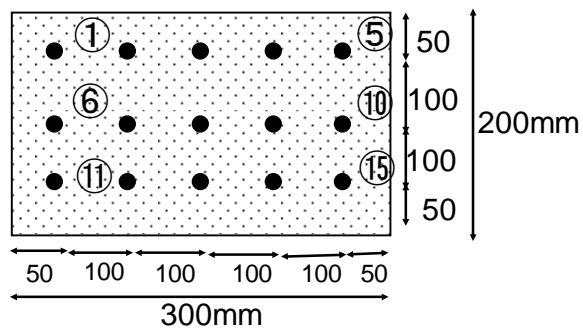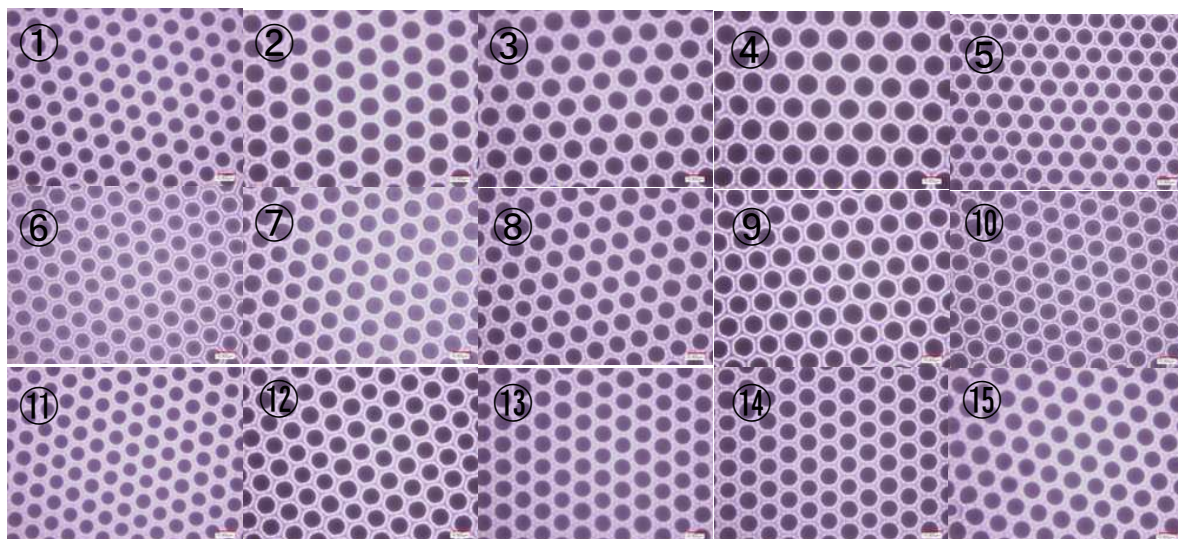

Supplement: c3sm52790e.pdf [file c3sm52790e.pdf]
